# Supplementary material for: Texture Analysis of Fractional Water Content Images Acquired during PET/MRI: Initial Evidence for an Association with Total Lesion Glycolysis, Survival and Gene Mutation Profile in Primary Colorectal Cancer
Source: MDPI journal article supplement (doi:10.3390/cancers13112715), 2021-05-31
Supplement: s1 [file s1]

# Supplementary Material: Texture Analysis of Fractional Water Content Images Acquired During PET/MRI: Initial Evidence for an Association with Total Lesion Glycolysis, Survival and Gene Mutation Profile in Primary Colorectal Cancer

Balaji Ganeshan, Kenneth Miles, Asim Afaq, Shonit Punwani, Manuel Rodriguez, Simon Wan, Darren Walls, Luke Hoy, Saif Khan, Raymond Endozo, Robert Shortman, John Hoath, Aman Bhargava Matthew Hanson, Daren Francis, Tan Arulampalam, Sanjay Dindyal, Shih-Hsin Chen, Tony Ng and Ashley Groves

**Table S1.** Mean and range of all the imaging parameters employed in the study.

| Tumor Characteristic                     | Mean   | Range         |
|------------------------------------------|--------|---------------|
| Fractional water content                 | 0.88   | 0.16–0.98     |
| MRTA of FW (without-filtration, SSF = 0) |        |               |
| SD                                       | 82.79  | 16.97–146.35  |
| Entropy                                  | 5.12   | 3.51–5.79     |
| MPP                                      | 0.88   | 0.16–0.98     |
| Skewness                                 | −1.57  | −2.41–1.61    |
| Kurtosis                                 | 3.66   | −6.79–10.95   |
| MRTA of FW (fine-scale, SSF = 2)         |        |               |
| Mean                                     | 144.18 | −65.21–399.56 |
| SD                                       | 257.96 | 108.75–359.73 |
| Entropy                                  | 6.23   | 5.27–6.76     |
| MPP                                      | 246.80 | 78.06–439.36  |
| Skewness                                 | 0.96   | 0.12–2.22     |
| Kurtosis                                 | 1.88   | −0.17–11.41   |
| MRTA of FW (medium-scale, SSF = 3)       |        |               |
| Mean                                     | 276.68 | −89.23–705.07 |
| SD                                       | 341.82 | 161.74–499.62 |
| Entropy                                  | 6.42   | 5.55–6.85     |
| MPP                                      | 379.83 | 123.35–773.96 |
| Skewness                                 | 0.68   | −0.06–2.27    |
| Kurtosis                                 | 0.68   | −0.83–8.99    |
| MRTA of FW (medium-scale, SSF = 4)       |        |               |
| Mean                                     | 413.91 | −98.89–952.59 |
| SD                                       | 391.55 | 208.89–571.80 |
| Entropy                                  | 6.53   | 5.73–7.02     |

|                                    |        |                 |
|------------------------------------|--------|-----------------|
| MPP                                | 505.52 | 172.55–1034.12  |
| Skewness                           | 0.43   | −0.19–2.05      |
| Kurtosis                           | 0.08   | −1.21–5.37      |
| MRTA of FW (medium-scale, SSF = 5) |        |                 |
| Mean                               | 544.79 | −101.12–1132.39 |
| SD                                 | 414.49 | 245.39–561.21   |
| Entropy                            | 6.58   | 5.87–7.16       |
| MPP                                | 620.92 | 212.76–1180.35  |
| Skewness                           | 0.23   | −0.36–1.73      |
| Kurtosis                           | −0.16  | −1.24–2.98      |
| MRTA of FW (coarse-scale, SSF = 6) |        |                 |
| Mean                               | 665.06 | −99.73–1257.67  |
| SD                                 | 421.61 | 271.27–575.13   |
| Entropy                            | 6.61   | 5.93–7.21       |
| MPP                                | 730.95 | 248.84–1271.93  |
| Skewness                           | 0.07   | −0.54–1.48      |
| Kurtosis                           | −0.20  | −1.34–1.64      |
| FDG PET uptake                     |        |                 |
| SUV <sub>max</sub>                 | 16.46  | 8.42–52.11      |
| SUV <sub>mean</sub>                | 9.63   | 4.65–32.12      |
| TLG                                | 207.09 | 18.22–1020.61   |
| ADC quantification                 |        |                 |
| ADC <sub>mean</sub> from ADCmaps   | 981    | 122–1310        |
| Skewness of ADC histogram          | 0.22   | −0.80–0.89      |
| Kurtosis of ADC histogram          | 0.16   | −0.74–1.93      |

**Table S2.** Intra-class correlation (ICC) values characterizing the inter-observer agreement for each texture parameter.

| Texture-scale, SSF          | Mean  | SD    | Entropy | MPP   | Skewness | Kurtosis |
|-----------------------------|-------|-------|---------|-------|----------|----------|
| Without-filtration, SSF = 0 | 0.980 | 0.402 | 0.832   | 0.980 | 0.623    | −0.152   |
| Fine, SSF = 2               | 0.866 | 0.870 | 0.878   | 0.878 | 0.685    | 0.910    |
| Medium, SSF = 3             | 0.899 | 0.901 | 0.879   | 0.929 | 0.814    | 0.889    |
| Medium, SSF = 4             | 0.916 | 0.905 | 0.881   | 0.953 | 0.838    | 0.913    |
| Medium, SSF = 5             | 0.927 | 0.871 | 0.871   | 0.956 | 0.875    | 0.901    |
| Coarse, SSF = 6             | 0.931 | 0.805 | 0.879   | 0.951 | 0.873    | 0.779    |

**Table S3.** FW texture correlates for TLG (false discovery rate limited to 0.1).

| Texture-Parameter | SSF (mm) | $r_s$  | $p$ -value |
|-------------------|----------|--------|------------|
| MPP               | 6        | −0.547 | 0.002      |
| Mean intensity    | 6        | −0.541 | 0.002      |
| Mean intensity    | 5        | −0.530 | 0.003      |
| Kurtosis          | 6        | 0.520  | 0.003      |
| MPP               | 2        | −0.503 | 0.005      |
| Entropy           | 6        | 0.498  | 0.005      |
| Mean intensity    | 4        | −0.487 | 0.006      |
| Mean intensity    | 3        | −0.485 | 0.007      |
| MPP               | 4        | −0.479 | 0.007      |
| Entropy           | 5        | 0.480  | 0.007      |
| MPP               | 5        | −0.478 | 0.008      |
| MPP               | 3        | −0.443 | 0.014      |
| Mean intensity    | 2        | −0.433 | 0.017      |
| Entropy           | 4        | 0.394  | 0.031      |
| Kurtosis          | 2        | 0.390  | 0.033      |
| Entropy           | 3        | 0.385  | 0.036      |
| Kurtosis          | 5        | 0.382  | 0.037      |
| Kurtosis          | 3        | 0.375  | 0.041      |
